# Supplementary material
Source: PubMed Central journal article supplement (PMC4477871)
Supplement: NIHMS685673-supplement-appendix.pdf [file NIHMS685673-supplement-appendix.pdf]

## Appendix A: Coding of Offenses From Monthly Arrest and Citation Register

|                                                | FBI Offense Codes            | California<br>Criminal Justice<br>Statistics Center<br>Code | Arrest Rate<br>per 10,000<br>Age 19-22 |
|------------------------------------------------|------------------------------|-------------------------------------------------------------|----------------------------------------|
| <u>All Arrests</u>                             |                              |                                                             | 1573                                   |
| <u>Violent</u>                                 | 01A, 01B, 02, 03, 04, 08     |                                                             | 156                                    |
| Murder and Non-negligent Manslaughter          | 01A                          |                                                             | 3.2                                    |
| Manslaughter by Negligence                     | 01B                          |                                                             | 0.41                                   |
| Forcible Rape                                  | 02                           |                                                             | 3.4                                    |
| Robbery                                        | 03                           |                                                             | 26                                     |
| Aggravated Assault                             | 04                           |                                                             | 66                                     |
| Other Assaults                                 | 08                           |                                                             | 57                                     |
| <u>Property</u>                                | 05, 06, 07, 13, 14           |                                                             | 236                                    |
| Burglary/Breaking and Entering                 | 05                           |                                                             | 62                                     |
| Larceny-theft                                  | 06                           |                                                             | 97                                     |
| Motor Vehicle Theft                            | 07                           |                                                             | 33                                     |
| Stolen Property; Buying, Receiving, Possessing | 13                           |                                                             | 26                                     |
| Vandalism                                      | 14                           |                                                             | 18                                     |
| <u>Illegal Drugs</u>                           | 18A, 18B, 18D, 18E, 18F, 18H |                                                             | 222                                    |
| Manufacture or Sale                            |                              |                                                             |                                        |
| -Opium or Cocaine and Derivatives              | 18A                          |                                                             | 26                                     |
| -Marijuana                                     | 18B                          |                                                             | 17                                     |
| -Other Dangerous Non-narcotic Drugs            | 18D                          |                                                             | 10                                     |
| Possession                                     |                              |                                                             |                                        |
| -Opium or Cocaine and Derivatives              | 18E                          |                                                             | 72                                     |
| -Marijuana                                     | 18F                          |                                                             | 51                                     |
| -Other Dangerous Non-narcotic Drugs            | 18H                          |                                                             | 46                                     |
| <u>Alcohol Related</u>                         | 21, 22, 23, 24, 25           | 47, 854                                                     | 397                                    |
| Driving Under the Influence                    | 21                           | 854                                                         | 208                                    |
| Liquor Laws                                    | 22                           |                                                             | 58                                     |
| Drunkenness                                    | 23                           | 47                                                          | 114                                    |
| Disorderly Conduct                             | 24                           |                                                             | 12                                     |
| Vagrancy                                       | 25                           |                                                             | 4.8                                    |
| <u>Other</u>                                   |                              |                                                             |                                        |
| Weapons; Carrying, Possessing, Etc             | 15                           |                                                             | 32                                     |
| County Ordinances                              |                              | 97                                                          | 61                                     |
| Traffic Violations                             |                              | 86, 87, 88                                                  | 120                                    |
| Hit and Run or Reckless Driving                |                              | 89, 860, 867, 869                                           | 28                                     |
| Uncategorized                                  |                              |                                                             | 323                                    |

Notes: The arrest data is from the California Monthly Arrest and Citation Register and the denominators are from the census. When possible crimes are coded based on FBI offense codes as used in the Uniform Crime Reports. Crimes not categorized based on FBI offense categories were coded based on California Criminal Justice Statistics Center Codes. Opium derivatives include morphine, heroin and codeine and other dangerous non-narcotic drugs include among other things barbiturates and benzedrine.

## Appendix B: Birthday Effects by Type of Crime

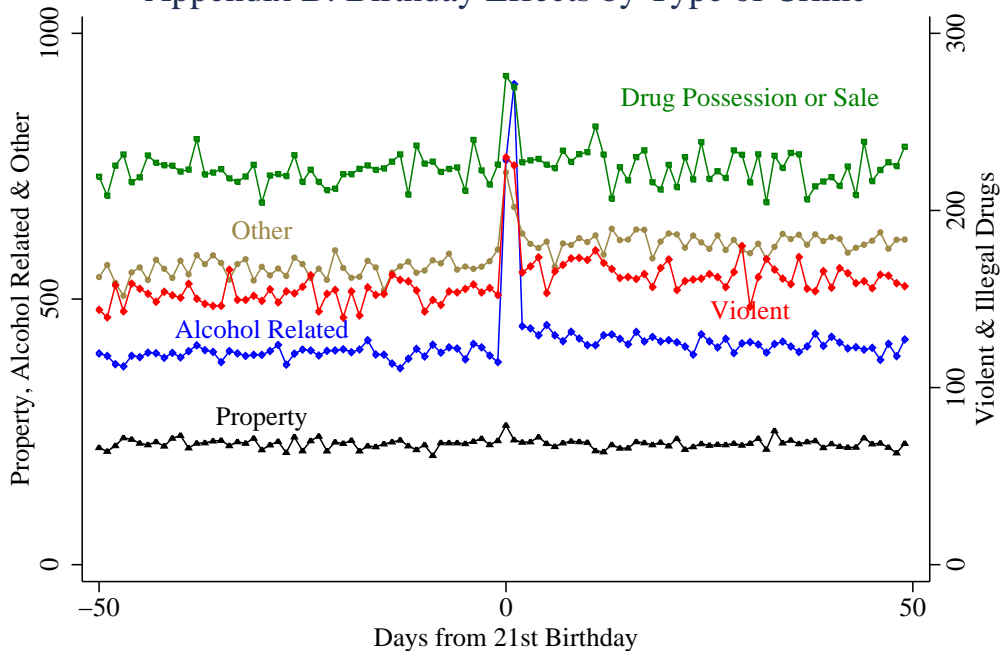

Note: Each point is a count of arrests for each crime type for a single day of age relative to the 21st birthday.

## Appendix C: Increase in Arrest Rates by Category

### Robustness to Bandwidth Choice

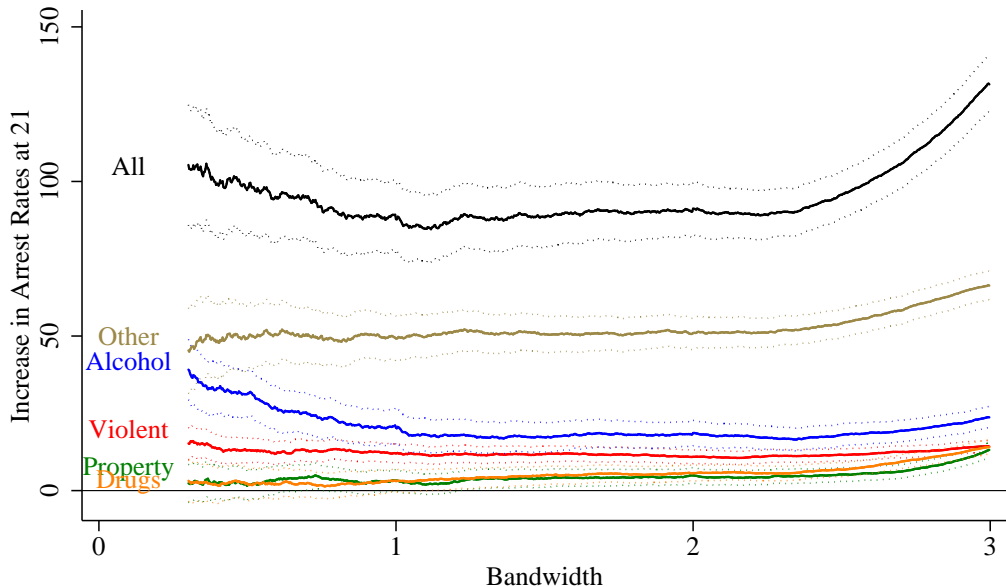

Note: The estimates of the increase at age 21 are from a second order quadratic polynomial fully interacted with an indicator variable for being over 21. The heavy line is the point estimate; the dotted line is the 95% confidence interval.

# Appendix D: Arrest Rates for Alcohol Related Crimes

## Robustness to Bandwidth Choice

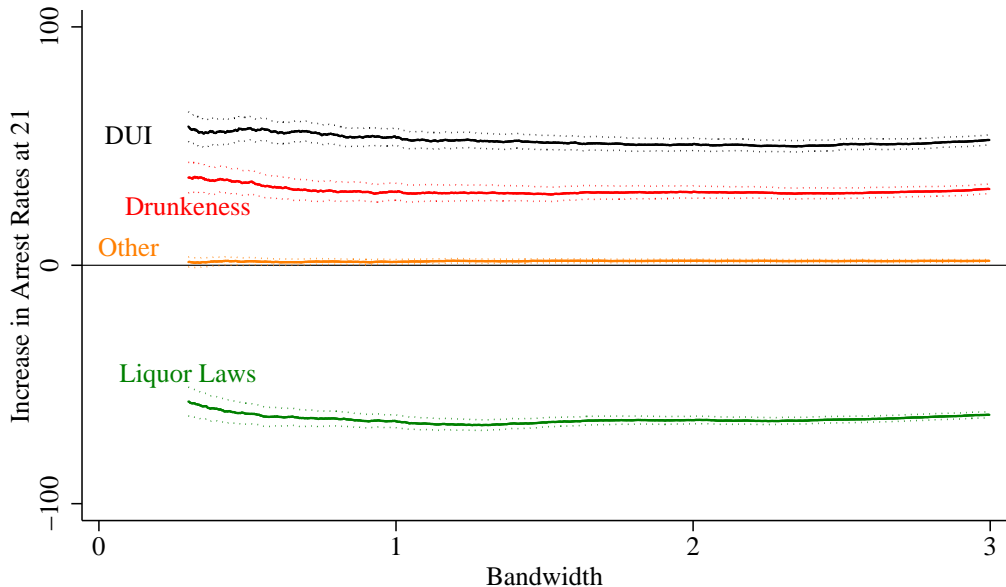

Note: The estimates of the increase at age 21 are from a second order quadratic polynomial fully interacted with an indicator variable for being over 21. The heavy line is the point estimate; the dotted line is the 95% confidence interval.

# Appendix E: Arrest Rates for Violent Crimes

## Robustness to Bandwidth Choice

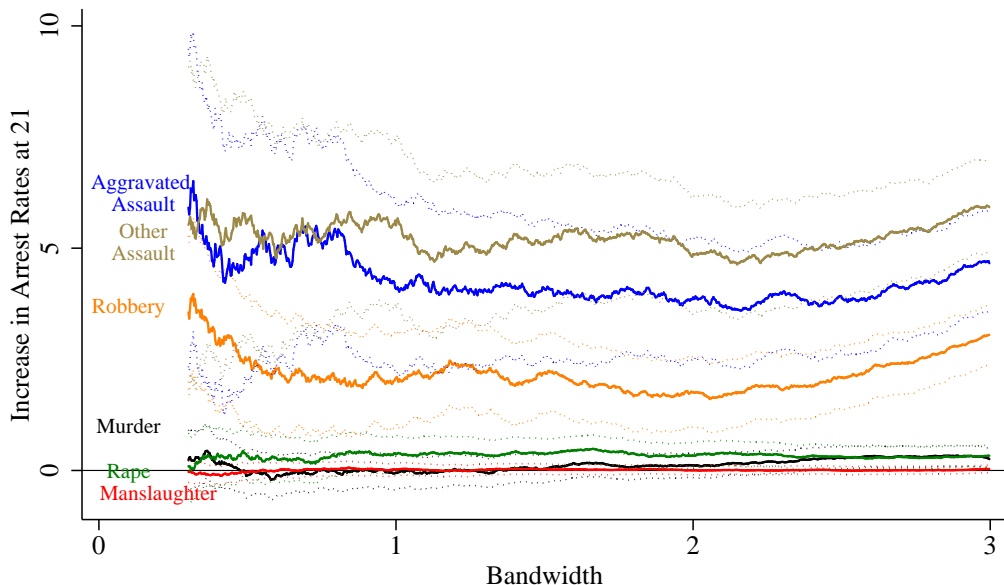

Note: The estimates of the increase at age 21 are from a second order quadratic polynomial fully interacted with an indicator variable for being over 21. The heavy line is the point estimate; the dotted line is the 95% confidence interval.

# Appendix F: Arrest Rates for Other Crimes

## Robustness to Bandwidth Choice

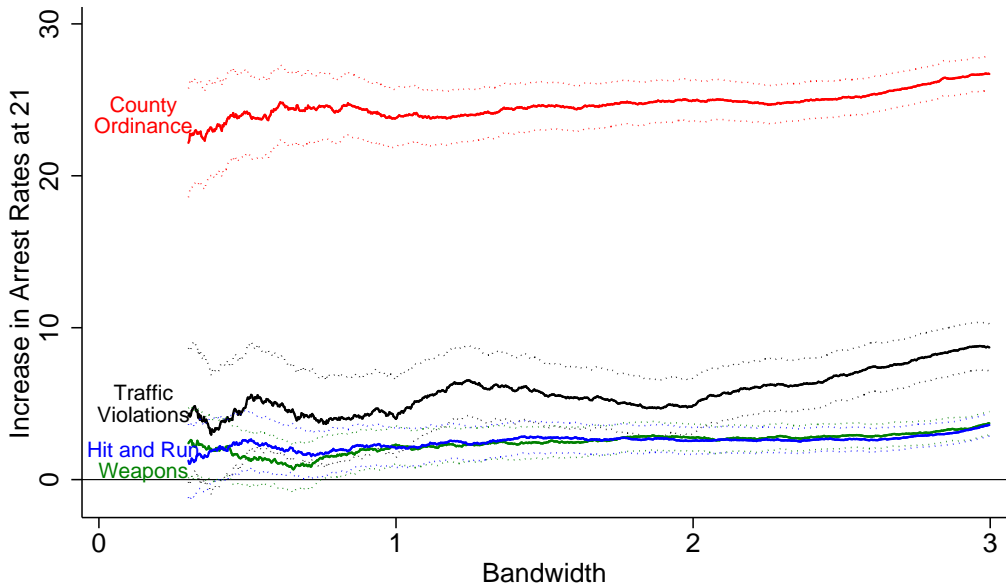

Note: The estimates of the increase at age 21 are from a second order quadratic polynomial fully interacted with an indicator variable for being over 21. The heavy line is the point estimate; the dotted line is the 95% confidence interval.

## Appendix G: Arrest Rates for Property Crimes

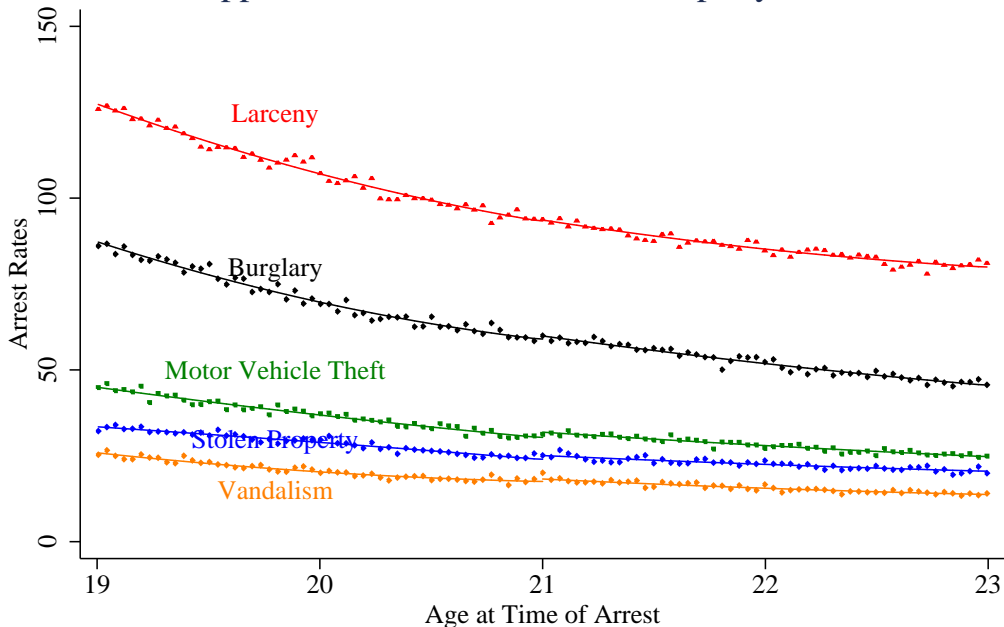

Note: The points are average arrest rates for 14 day cells and the fitted lines are from a second order quadratic polynomial in age estimated separately on either side of age 21 threshold. For codes that make up categories see web Appendix A.

# Appendix H: Arrest Rates for Drug Possession or Sale

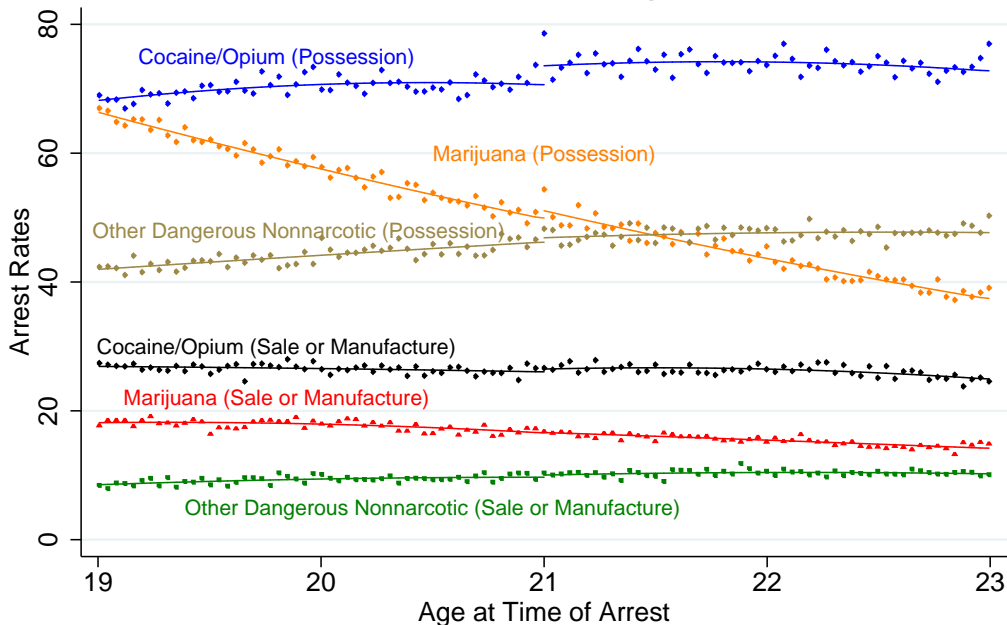

Note: The points are average arrest rates for 14 day cells and the fitted lines are from a second order quadratic polynomial in age estimated separately on either side of age 21 threshold. For codes that make up categories see web Appendix A.



## Appendix I: Change in Arrests Rates at Age 21 (By Crime Category)

|                    | Burglary<br>Breaking and<br>Entering                 | Larceny-theft                       | Motor Vehicle<br>Theft                            | Stolen<br>Property;<br>Buying,<br>Receiving,<br>Possessing | Vandalism               |                                                  |
|--------------------|------------------------------------------------------|-------------------------------------|---------------------------------------------------|------------------------------------------------------------|-------------------------|--------------------------------------------------|
| Increase at 21     | 1.070<br>(0.634)                                     | 0.351<br>(0.821)                    | 1.587<br>(0.488)                                  | 1.120<br>(0.436)                                           | 0.796<br>(0.369)        |                                                  |
| Rate Just Under 21 | 59.0                                                 | 93.5                                | 30.4                                              | 24.0                                                       | 17.6                    |                                                  |
|                    | Cocaine and<br>Derivatives<br>Manufacture<br>or Sale | Marijuana<br>Manufacture<br>or Sale | Dangerous<br>Non-narcotic<br>Drugs<br>Manufacture | Opium or<br>Cocaine and<br>Derivatives<br>Possession       | Marijuana<br>Possession | Dangerous<br>Non-narcotic<br>Drugs<br>Possession |
| Increase at 21     | 0.397<br>(0.429)                                     | 0.069<br>(0.348)                    | 0.314<br>(0.273)                                  | 2.902<br>(0.710)                                           | 1.274<br>(0.596)        | 0.639<br>(0.607)                                 |
| Rate Just Under 21 | 26.1                                                 | 16.6                                | 9.7                                               | 70.7                                                       | 50.0                    | 46.2                                             |

Notes: The first line contains the estimate of the discrete increase at age 21 in arrest rates for each crime type. The regressions include a quadratic polynomial in age fully interacted with an indicator variable for age over 21 and indicator variables for 19th, 20th, 21st and 22nd birthdays and the days immediately after. The regressions are estimated based on arrests of people 19 to 22 years old. Each observation is the arrest rate per 10,000 person years x days from a person's 21st birthday. Standard errors are in parenthesis below the point estimates. For the FBI offense codes and California Criminal Justice Statistics Center Code for each crime type see web Appendix A.

### Appendix J: Location of Arrests for Assault by Age (National Incident Based Reporting System 2000-2005)

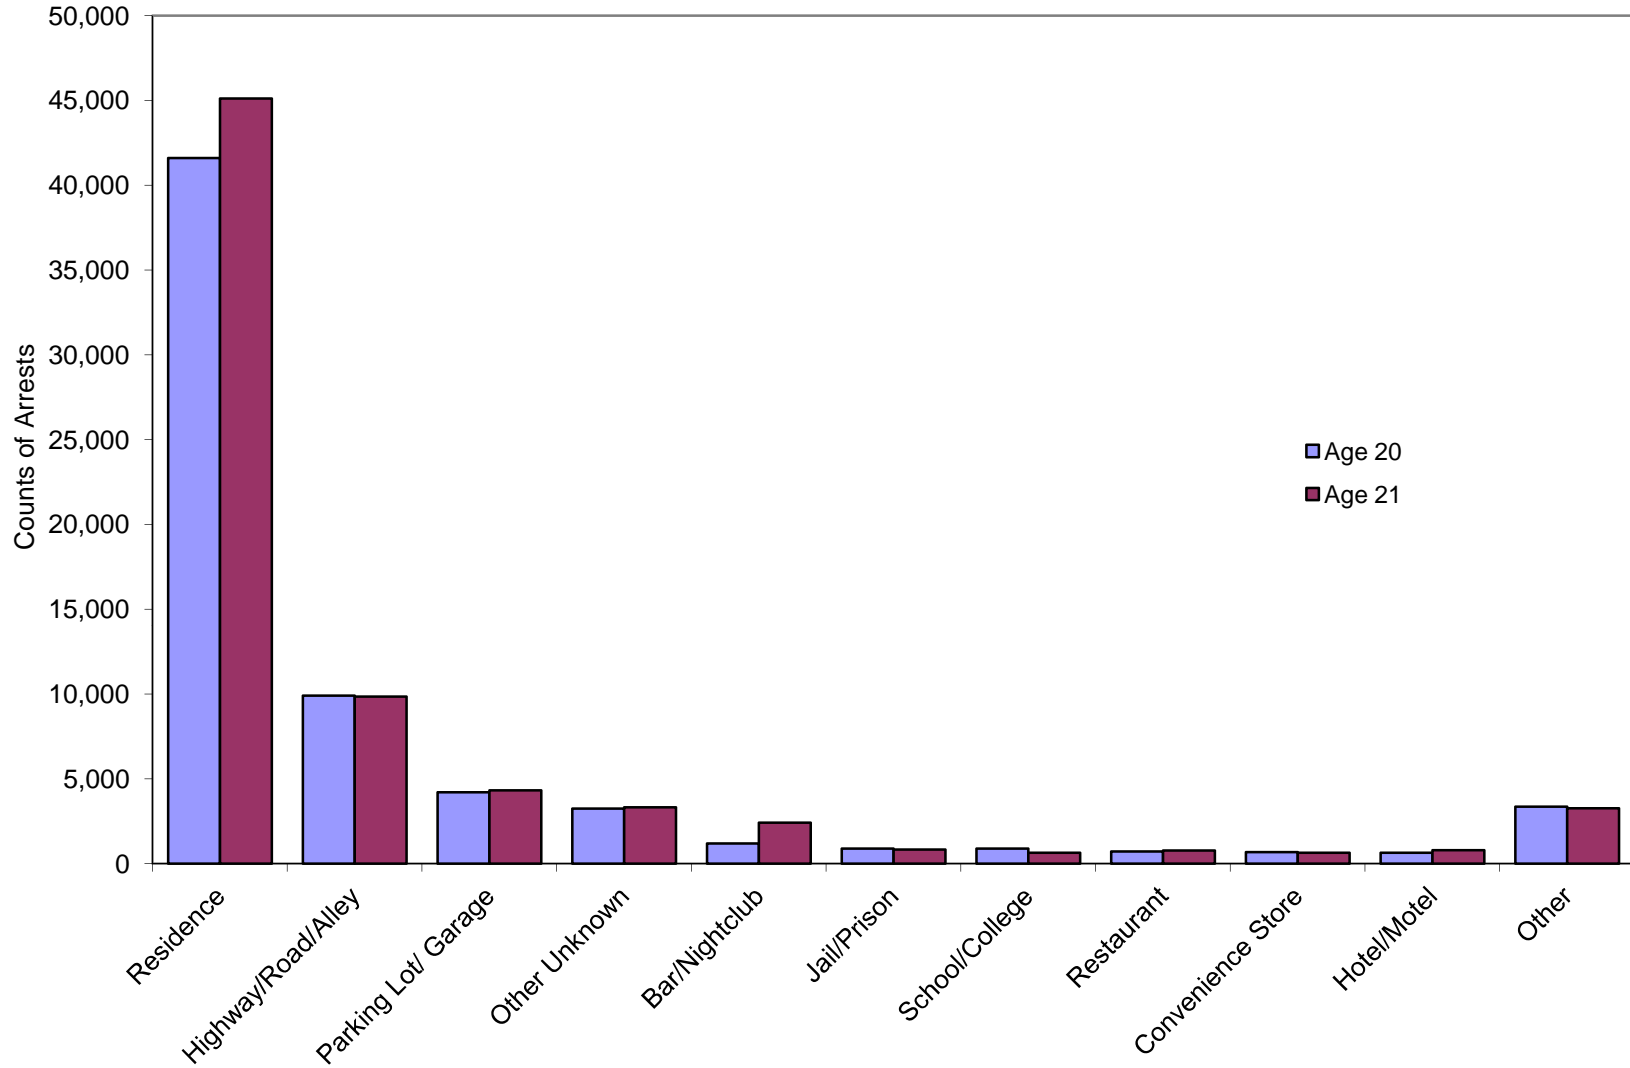

Notes: From NIBRS arrestee data 2000-2006. The figure includes arrests for UCR offense code 13A (aggravated assault), 13B (simple assault) and 13C (intimidation). The increase in arrests for assaults at age 21 is approximately 5.5% above trajectory.

## Appendix K: Persistence of Effects

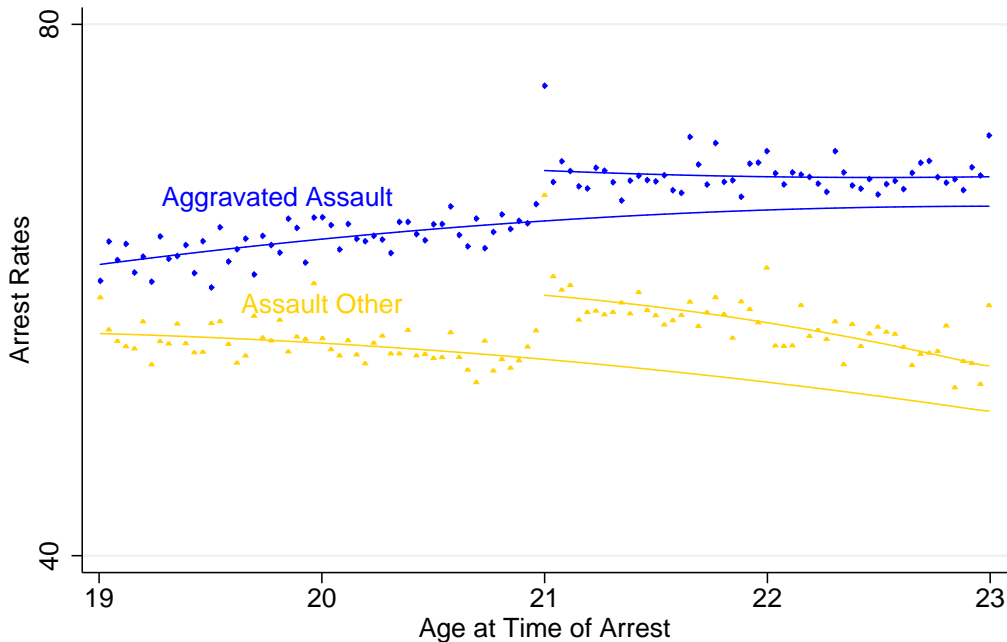

Note: The projection of the counterfactual is based on a second order polynomial fitted to the arrest rates of those under 21.

# Appendix L: Drinking and Binge Drinking in the Past Month

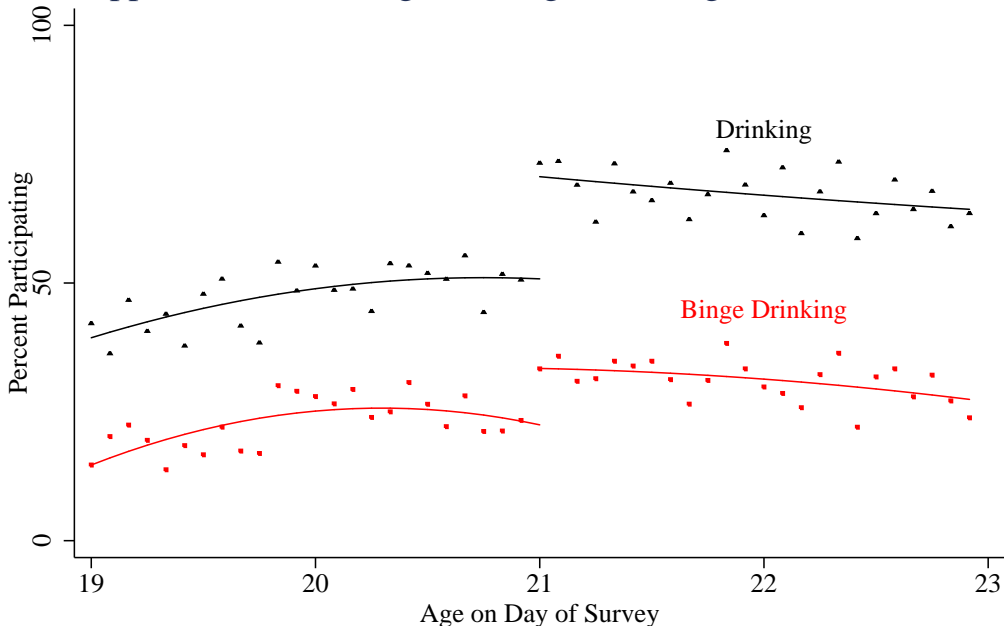

Note: From California Health Interview Survey 2001–2005. The points are averages for 30 day cells and the fitted lines are from a second order quadratic polynomial in age estimated separately on either side of age 21 threshold.

# Appendix M: Percent of Days Drinking and Binge Drinking

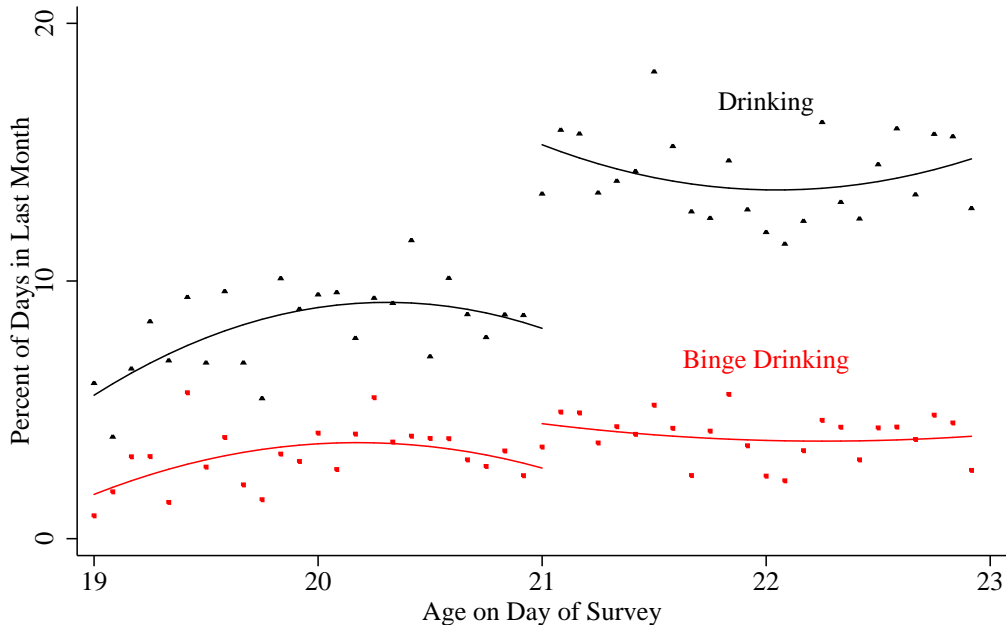

Note: From California Health Interview Survey 2001–2005. The points are averages for 30 day cells and the fitted lines are from a second order quadratic polynomial in age estimated separately on either side of age 21 threshold.

## Appendix N: Change in Alcohol Consumption at Age 21

---

|                                                          | Drank Last<br>Month | Binged Last<br>Month | Percent of<br>Days Drank | Percent of<br>Days<br>Binged |
|----------------------------------------------------------|---------------------|----------------------|--------------------------|------------------------------|
| Estimated using: Quadratic<br>Polynomial                 | 16.14<br>(5.49)     | 7.49<br>(4.74)       | 4.76<br>(1.83)           | 1.07<br>(0.90)               |
| Estimated using: Quadratic<br>Polynomial with Covariates | 16.09<br>(5.38)     | 6.04<br>(4.72)       | 4.66<br>(1.77)           | 0.85<br>(0.90)               |

---

Notes: These estimates are from the 2001, 2003 and 2005 waves of the California Health Interview Survey. The dependent variables in columns 1 and 2 are indicator variables for drinking or binge drinking in the past month. The dependent variable in columns 3 and 4 are the proportion of days on which people reported they drank or drank heavily. The point estimates and their standard errors have been multiplied by 100 to convert to percents. The polynomials in age are fully interacted with a dummy for being over 21. Only people 19 to 22 years old at the time of the interview are included in the regression which gives a sample size of 5,557. Robust standard errors are in parenthesis below the point estimates. The covariates include dummies for male, black, Latino, API, interview in month of birth, year of interview, month of interview, no HS diploma, some college, married, employed, and has health insurance.

# Appendix O: Percent of Days Drinking and Binge Drinking

## Robustness to Bandwidth Choice

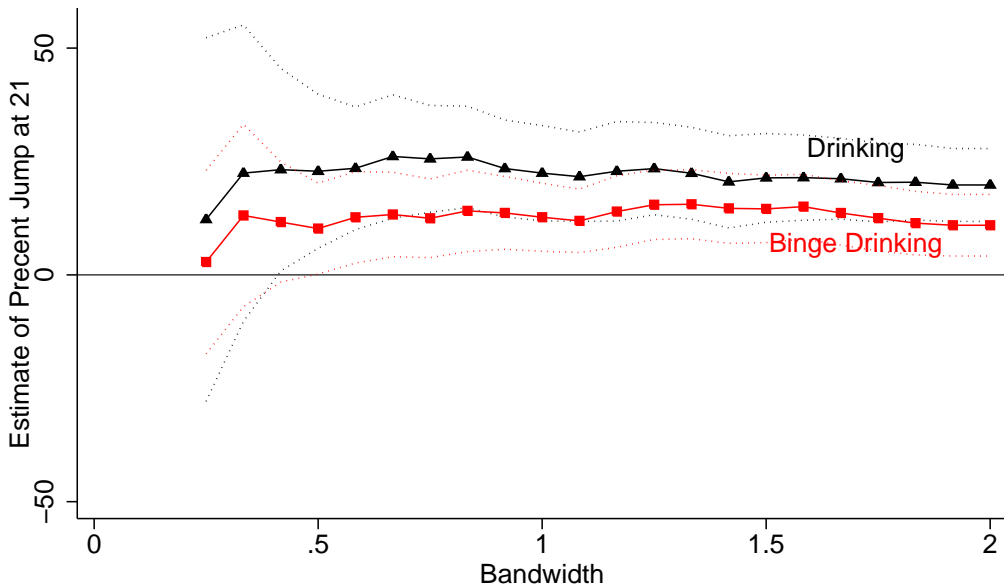

Note: The estimates of the increase at age 21 are from a second order quadratic polynomial fully interacted with an indicator variable for being over 21. The heavy line is the point estimate; the dotted line is the 95% confidence interval.

# Appendix P: Percent of Days Drinking and Binge Drinking

## Robustness to Bandwidth Choice

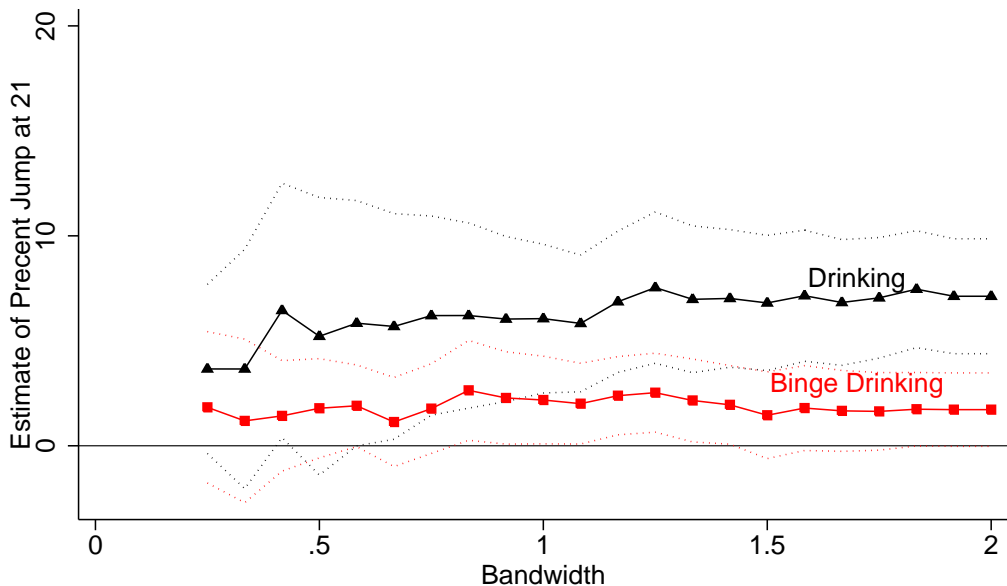

Note: The estimates of the increase at age 21 are from a second order quadratic polynomial fully interacted with an indicator variable for being over 21. The heavy line is the point estimate; the dotted line is the 95% confidence interval.



## Appendix Q: Change in Potential Confounders at Age 21

---

|                               | Married        | Employed       | No HS<br>Diploma | HS<br>Graduate  | Some<br>College | Health<br>Insurance |
|-------------------------------|----------------|----------------|------------------|-----------------|-----------------|---------------------|
| Estimated Change at Age<br>21 | 0.04<br>(2.54) | 2.37<br>(5.34) | 0.07<br>(3.53)   | -0.09<br>(3.56) | 1.06<br>(5.33)  | 2.24<br>(4.28)      |

---

Notes: See notes to Appendix N. The dependent variable for each regression is at the top of the column. The point estimates and their standard errors have been multiplied by 100 to convert to percents
